# Supplementary material for: Introducing Ice Nucleating Particles functionality into the Unified Model and its impact on the Southern Ocean short-wave radiation biases
Source: Copernicus journal article supplement (doi:10.5194/acp-2021-438), 2021-06-11
Supplement: Supplementary file [file acp-2021-438-AC2-supplement.pdf]

## Reviewer 2 comments

### Summary

In the manuscript titled “Introducing Ice Nucleating Particles functionality into the Unified Model and its impact on the Southern Ocean short-wave radiation biases”, Varma et al. aim to implement an updated heterogeneous ice nucleation parameterization into the Unified Model in order to represent varying abundancies of ice nucleating particles. Ultimately, the goal of this study was the reduce shortwave radiation biases over the Southern Ocean, which is an active area of research.

Varma propose and implement a heterogenous ice nucleation parameterization approach that scales the primary ice nucleation temperature based on dust number concentrations. In comparing a 20-year simulation with the default physics (control) to 20-year simulation with the updated ice nucleation scheme, they report an overall decrease in ice water and increase in liquid water. Their results indicate simulated outgoing SW radiation decreased and cloud fraction also decreased with the proposed ice nucleation scheme. Varma et al. attribute these findings to additional feedbacks associated with convective cloud physics scheme, including a parameter that defines cloud fractions associated with a given amount of detrained condensation that differs between liquid and frozen clouds. The authors report that this approach 1) “improves the physics of the model” (line 234) and 2) “is one of the first global atmospheric models to implement such an approach to simulated the roles of INPs with minimum complexity in the micro-physics scheme to improve the SW radiation biases over the SO region”.

While the topics of southern ocean ice nucleation, cloud phase, and SW radiation are very important, I have major concerns with this study. If my comments were to be adequately addressed, I think the study would change entirely and need to be resubmitted as a separate publication. Therefore, I recommend this manuscript to be rejected.

## General Comments

Major Comment 1 – A major concern of this study is the approach for representing heterogeneous ice nucleation. The proposed parametrization essentially scales the heterogeneous ice nucleation temperature ( $t_{hetr}$ ) based on dust number concentrations relative to an arbitrary reference dust concentration ( $refdust$ ), such that  $t_{hetr}$  is lower (higher) for mixed phase clouds in regions with dust concentrations lower (higher) than  $refdust$ .  $refdust$  is completely arbitrary, referred to as a “tuning parameter”, and is mentioned (line 121) to be a heuristic parametrization. A first major question is why was an existing dust ice nucleating particle parameterization not considered for this study? Neimand et al., 2012 and DeMott et al., 2015 are well-vetted dust-specific INP parameterizations that have been tested against laboratory and field measurements and have also been implemented into global models (Zhao et al., 2020). While the authors appear optimistic that observations could help constrain parameters in their  $t_{hetr}$  parameterization, it is not obvious how one would constrain non-physical parameters like  $t_{hetr}$  and  $refdust$ . This approach is likely highly sensitive to  $refdust$ , though the sensitivity of the study results to  $refdust$  is not tested here. Another major question is, given the number of challenges involved in simulating aerosol and ice nucleating particles, the parameterization needs to be assessed for accuracy and skill. There are observations of ice nucleating particles over the Southern Ocean that not included in this study, and I do not see a path in which this parameterization could be evaluated. It is also not clear how accurate simulated dust concentrations are in the Unified Model.

We would like to thank the reviewer for the very helpful review. We now added to the Introduction section that, in order to implement and thoroughly examine the impact of dust as INP on cloud radiation properties as per these existing parametrisations, ideally state-of-the-art atmospheric models with extensive double-moment bulk micro-physics schemes or comprehensive aerosol models that allow the identification of aerosol species and number densities etc are desired. However, for low-resolution GCMs (like ours), this is not currently available. Our model does not identify the dust species or number densities but rather provide the mass mixing ratios based on representative diameters belonging to 6 size bins. This makes any direct one-on-one comparison practically impossible. However, we have included an interim comparison with the Demott et al 2010 in the Supplementary material now. There are currently ongoing developments on the implementation of a GLOMAP dust scheme (which allows the speciation of dust and use/comparison of some of the existing dust INP parametrisations feasible in the future).

Major Comment 2 – I also have a major concern regarding the authors arguing that adding this new approach improves the model physics. First, I do not think the parameterization is in any way based on our understanding of the physical process of ice nucleation (i.e., for a given temperature, the available

number of ice nucleating particles depends on the aerosol population including the abundance and composition). I also do not see how the parameterization can be physically constrained. Regardless, I also do not see an assessment of the model performance with the “improved” physics. I only see analyses on changes in simulated clouds from the control simulation. Without an assessment of simulated clouds or TOA SW radiation, it is not clear that the model has actually been improved.

We have restructured and modified the paper to convey our message clearly in the recent version along with the added details (like comparison with observational data and model fluxes, Demott et al 2010 etc) in the Supplementary material. In terms of the elaborate assessment of the improved model physics, it can only come through improving the bias and rmse. But usually, in GCMs, several other aspects need to be tested and changed as well that ensure the climate model is radiatively balanced.

Major Comment 3 – I had a difficult time understanding what the results were from this study. While I understand that overall the liquid water path increased and ice water path decreased over the Southern Ocean region in the modified model compared to the control simulation, the overall bias was not assessed. I also do not understand the additional simulations used to assess changes in cloud cover and the convective scheme. There is an overall lack of explanation regarding why specific things were tested and what these could tell us. Additionally, there are many details missing that would limit the study from being reproducible, including how cloud level types are defined, what parameters in the convective scheme are changed and to what values.

We have now modified the manuscript content in general so that the focus of the study is highlighted clearly, which is to have a more targeted distribution of SCL over the SO region compared to our earlier capacitance study (Varma et al 2020). We have also restructured the Discussion section by moving some of the earlier content to the Supplementary material.

## Specific Comments

Introduction:

L44 – “Our focus will be on the immersion freezing process as it is the most commonly implemented heterogeneous ice nucleation process in global climate models (GCMs).” It is unclear to me what is meant by this. Do you mean that the immersion freezing process is most active in GCMs? Is it the case that immersion freezing is expected to be a common ice nucleation pathway in these low-level stratocumulus clouds? Do you have a reference for this?

Modified the statement.

L53 – “Among these, mineral dust is . . . “ I agree that mineral dust is a strong source of ice nucleating particles near land sources, but many studies have highlighted the role of marine ice nucleating particles in remote regions, especially the Southern Ocean (Burrows et al., 2013, Wilson et al., 2015, McCluskey et al., 2019). Why are marine sources ignored in this study?

Although we acknowledge the significance of PMOA as a potential INP, in the model version that we use, the marine organic emission is just lumped in terms of tracers and to make the link with the INP and the marine organic number concentration is not possible at this stage.

L54 – “in the generally low INP environment over the SO region” – how low? Please provide a reference (e.g., McCluskey et al., 2018; McFarquhar et al., 2020; Schmale. Et al., 2021)

We have modified the Introduction section.

L55 – “. . . INP dependency on immersion freezing is not included in most of the GCMs” – I believe the authors mean “immersion freezing dependency on INPs”. Note that this is not necessarily the case anymore. See CESM2 ice nucleation scheme (e.g., Gettelman et al., 2019) which is based on the classical nucleation theory approach for estimating ice nucleation rates based on dust aerosol abundance from Hoose et al., 2010 and implemented into CESM by Wang et al., 2014. (note this CNT parametrization is referred to later, Line 65)

Modified the sentence

L67 – Just because mineral dust is a globally dominant in immersion freezing does not mean mineral dust dominates over the Southern Ocean region. Please include a discussion on the marine source of INPs.

Same as reply to comment on L53.

Methods:

L87 – “paucity in INPs in clean environments. . .” – How low? Please include references.

Modified.

L92 – While the number density of dust is low over the SO region, studies have determined it possible for even small amounts of dust to have a strong influence on INP estimates (E.g., Zhao et al., 2020). How accurate is the simulated dust aerosol in regions far-removed from dust sources? Are there previous papers

that have assess the dust concentrations from this model, or possible observational datasets that could be used to make sure the dust concentrations are reasonable? Couldn't this can be particularly important over the remote ocean, where the INP number concentrations are extremely low and exceptionally sensitivity to transported aerosol?

As clarified in the modified version, we have adopted an approach as a workaround for the lack of INPs (dust or any other kind) in the current version of the model. Dust is only chosen so as to give the nucleation temperatures a hemispherical asymmetry for a targeted formation of SCL over the SO region. In addition, our parameterisation as an interim INP workaround is compared with the Demott et al 2010 study (added in the Supplementary material)

L116 - Please see Major Comment 1 regarding the proposed IN parametrization.

- I do not follow how the authors segregated identified the cloud level types used in Figures 7, 8, and 9.

Added details in the figure title that they follow ISCCP cloud level types. Also removed Figs 7 and 9.

- The authors mention an additional simulation previously published by Varma et al. (2020) and use these simulations as an additional comparison. The details of those simulations, or reasoning for included them in this paper are not clear to me.

In the modified version of the manuscript, we have made it clear that the intent of this study is to have a targeted distribution of SCL over the SO region compared to the earlier Varma et al 2020 study. We have also removed the comparison with  $exp_{cap}$  from the Discussion section and now use that experiment only to show that SCL is more confined to SO region in the new approach.

Results

L150 – it is extremely difficult to interpret figure 5 due to their small size and font size.

Modified the figure.

L172 – I think the discussion regarding the reduction in TOA outgoing SW radiation cloud fraction needs to be expanded. The authors state “This is probably because, previously, the large amounts of ice clouds were introducing compensating errors, which the new scheme now removes” – what compensating errors? Can the authors expand on this?

Modified the sentence.

Discussion:

L183 – What is the reason for comparing to the expcap study? Did I miss that? Because this is not clear, I do not really follow most of this discussion.

Modified the Discussion section. expcap study is now only used as a reference for the motivation of this approach.

L184 -How were the model data segregated identified the cloud level types used in Figures 7, 8, and 9? Are these statistically significant differences between the exp simulations and control simulations?

Modified figure caption that now includes they are identified similar to that of the ISCCP cloud level types. Also, removed Figs 7 and 9.

L192 – this paragraph regarding “potential feedback processes from the convections scheme” is confusing without the support analysis? I think there would be room for more discussion on this.

Added details in the Supplementary material under 'Additional experiment'.

L203 – The authors introduce two more simulations, but it is not clear to me what is being changed. Perhaps adding the simulation details to the table would help. What is the difference between *expeff* and *controleff*? How would one constrain the parameters that control cloud fraction (a non-physical quantity) and detrained condensate (perhaps physical, but difficult to isolate). What values were used in the *expeff* and *controleff* experiments?

We have removed the *expeff* and added more details in the Supplementary material.

Conclusions

L226 – “this approach provides a more realistic representation of nucleation temperatures...” – how do you know this is more realistic? One needs some comparisons against observations to claim this.

We have modified this to 'more realistic representation of SCL content'. In the study by Bodas Salcedo et al 2016, they have shown using cyclone composite analysis and observational data that SO is dominated by SCL and we have already added this reference.

## References

Burrows, S. M., Hoose, C., Pöschl, U. Lawrence, M. G. Ice nuclei in marine air: biogenic particles or dust? *Atmospheric Chemistry and Physics* 13, 245–267 (2013).

DeMott, P. J. et al. Integrating laboratory and field data to quantify the immersion freezing ice nucleation activity of mineral dust particles. *Atmospheric Chemistry and Physics* 15, 393–409 (2015).

Gettelman, A. et al. High Climate Sensitivity in the Community Earth System Model Version 2 (CESM2). *Geophysical Research Letters* 46, 8329–8337 (2019).

Hoose, C., Kristjánsson, J. E., Chen, J.-P. Hazra, A. A Classical-Theory-Based Parameterization of Heterogeneous Ice Nucleation by Mineral Dust, Soot, and Biological Particles in a Global Climate Model. *Journal of the Atmospheric Sciences* 67, 2483–2503 (2010).

Wang, Y., Liu, X., Hoose, C. Wang, B. Different contact angle distributions for heterogeneous ice nucleation in the Community Atmospheric Model version 5. *Atmospheric Chemistry and Physics* 14, 10411–10430 (2014).

Niemand, M. et al. A Particle-Surface-Area-Based Parameterization of Immersion Freezing on Desert Dust Particles. *Journal of the Atmospheric Sciences* 69, 3077–3092 (2012).

McCluskey, C. S. et al. Observations of Ice Nucleating Particles Over Southern Ocean Waters. *Geophysical Research Letters* 45, 11,989–11,997 (2018).

McCluskey, C. S., DeMott, P. J., Ma, P. & Burrows, S. M. Numerical Representations of Marine Ice Nucleating Particles in Remote Marine Environments Evaluated Against Observations. *Geophys. Res. Lett.* 46, 7838–7847 (2019).

McFarquhar, G. M. et al. Observations of Clouds, Aerosols, Precipitation, and Surface Radiation over the Southern Ocean: An Overview of CAPRICORN, MARCUS, MICRE, and SOCRATES. *Bulletin of the American Meteorological Society* 102, E894–E928 (2021).

Schmale, Julia, et al. "Overview of the Antarctic circumnavigation expedition: Study of preindustrial-like aerosols and their climate effects (ACE-SPACE)." *Bulletin of the American Meteorological Society* 100.11 (2019): 2260-2283.

Wilson, T. W. et al. A marine biogenic source of atmospheric ice-nucleating particles. *Nature* 525, 234–238 (2015).

Zhao, X., Liu, X., Burrows, S. Shi, Y. Effects of Marine Organic Aerosols as Sources of Immersion-Mode Ice Nucleating Particles on High Latitude Mixed-Phase Clouds. <https://acp.copernicus.org/preprints/acp-2020-674/> (2020) doi:10.5194/acp-2020-674.
